# Supplementary material for: Multifunctional CaSc2O4:Yb3+/Er3+ one-dimensional nanofibers: electrospinning synthesis and concentration-modulated upconversion luminescent properties
Source: Royal Society of Chemistry journal article supplement (doi:10.1039/c7tc00188f), 2017-01-01
Supplement: c7tc00188f1.pdf [file c7tc00188f1.pdf]

## Supporting Information

### **Multifunctional $\text{CaSc}_2\text{O}_4:\text{Yb}^{3+}/\text{Er}^{3+}$ one-dimensional nanofibers: Electrospinning synthesis and concentration-modulated upconversion luminescent properties**

Meihong Liu<sup>1</sup>, Ming Gu<sup>1</sup>, Yue Tian<sup>1,2\*</sup>, Ping Huang<sup>1</sup>, Lei Wang<sup>1</sup>, Qiufeng Shi<sup>1</sup>, Cai'e Cui<sup>1,\*</sup>

<sup>1</sup> Key Lab of Advanced Transducers and Intelligent Control System of Ministry of Education, College of Physics and Optoelectronics, Taiyuan University of Technology, Taiyuan 030024, PR China

<sup>2</sup> Molecular Foundry, Lawrence Berkeley National Laboratory, Berkeley, CA 94720, USA

\* Correspondence and requests for materials should be addressed to Y.T. (email: [tianyue@tyut.edu.cn](mailto:tianyue@tyut.edu.cn), [yuetian@lbl.gov](mailto:yuetian@lbl.gov)).

### **Preparation of bulk $\text{CaSc}_2\text{O}_4:\text{Yb}^{3+},\text{Er}^{3+}$ phosphor**

Bulk  $\text{CaSc}_2\text{O}_4:5\text{mol}\%\text{Yb}^{3+},3\text{mol}\%\text{Er}^{3+}$  phosphor was prepared via solid state reaction. Typically, raw materials including  $\text{CaCO}_3$  (AR),  $\text{Sc}_2\text{O}_3$  (99.99%),  $\text{Yb}_2\text{O}_3$  (99.99%) and  $\text{Er}_2\text{O}_3$  (99.99%) were ground homogeneously by an agate mortar for 1h. Then the mixture was calcined at 1500 °C for 4h. After cooling to room temperature naturally, the product was reground for the further study.

### **Preparation of hexagonal $\text{NaYF}_4:\text{Yb}^{3+},\text{Er}^{3+}$ nanoparticles**

Hexagonal  $\text{NaYF}_4:20\text{mol}\%\text{Yb}^{3+},2\text{mol}\%\text{Er}^{3+}$  nanoparticles were prepared reported in the literature. Typically, the solution of oleic acid (6 mL) and octadecene (15 mL) containing  $\text{YCl}_3$ ,  $\text{YbCl}_3$  and  $\text{ErCl}_3$  was heated at 110 °C under vacuum for 1h. After being cooled down to room temperature, 10 ml of methanol solution containing NaOH (0.1 g) and  $\text{NH}_4\text{F}$  (0.148 g) was slowly added into the solution with magnetic stirring. Keeping stirring continuously, the solution was heated at 70 °C for 30 min to remove methanol, and then heated at 320 °C for 1 h under nitrogen. After the solution was cooled down naturally, the product was collected via centrifugation and washed with ethanol and washed with cyclohexane for three times. Finally,  $\text{NaYF}_4:\text{Yb}^{3+},\text{Er}^{3+}$  nanoparticles were dried at 80 °C for 10 h.

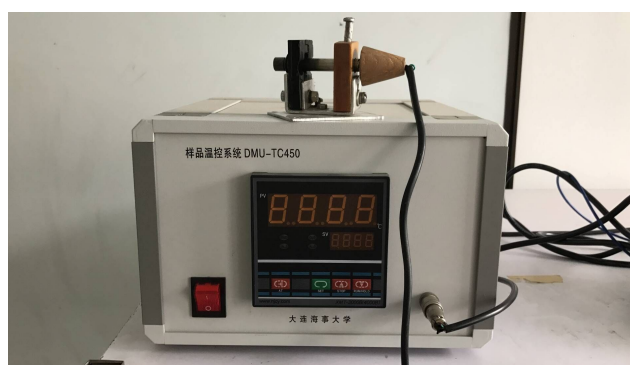

Fig. S1. Picture of the self-made temperature controller.

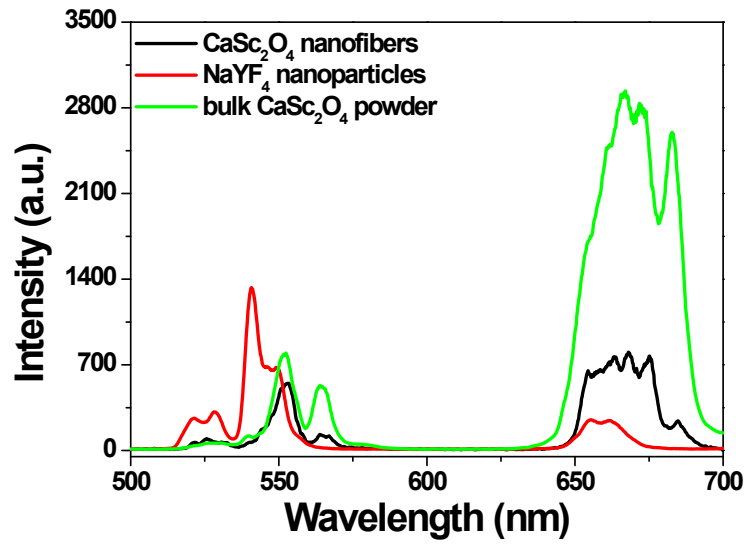

Fig. S2. Upconversion emission spectra of the CaSc<sub>2</sub>O<sub>4</sub> nanofibers, NaYF<sub>4</sub> nanoparticles and bulk CaSc<sub>2</sub>O<sub>4</sub> phosphor upon excitation of 980 nm at 560 mW/cm<sup>2</sup>.

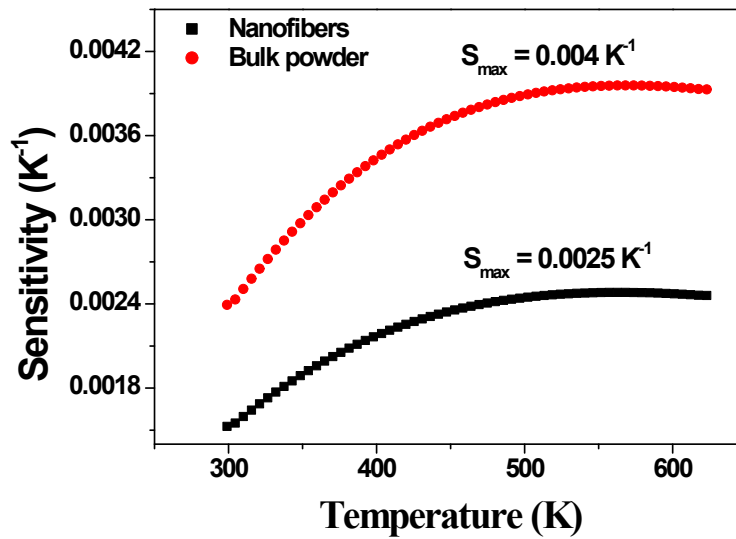

Fig. S3. Sensitivity as a function of temperature for the CaSc<sub>2</sub>O<sub>4</sub> nanofibers and bulk CaSc<sub>2</sub>O<sub>4</sub> phosphor.

#### Reference

1. J. Li, J. H. Zhang, Z. D. Hao, X. Zhang, J. H. Zhao and Y. S. Luo, *J. Appl. Phys.*, 2013, **113**,

223507.

2. W. Yu, W. Xu, H. W. Song and S. Zhang, *Dalton Trans.*, 2014, **43**, 6139-6147.
